# Seven-Year Changes in Body Fat and Visceral Adipose Tissue in Women

## Associations with indexes of plasma glucose-insulin homeostasis

SIMONE LEMIEUX, PHD  
DENIS PRUD'HOMME, MD, MSC  
ANDRÉ NADEAU, MD

ANGELO TREMBLAY, PHD  
CLAUDE BOUCHARD, PHD  
JEAN-PIERRE DESPRÉS, PHD

**OBJECTIVE** — To study the associations between changes in body fatness, visceral adipose tissue (AT), and indexes of plasma glucose-insulin homeostasis over a 7-year follow-up period.

**RESEARCH DESIGN AND METHODS** — A sample of 30 nondiabetic women aged  $35.2 \pm 5.6$  (SD) years at baseline was studied.

**RESULTS** — Changes in visceral AT and in subcutaneous AT (measured by computed tomography) as well as changes in body fat mass (obtained by hydrostatic weighing) were significantly related to changes in fasting plasma insulin levels and in plasma insulin area measured after a 75-g oral glucose load ( $0.47 \leq r \leq 0.62$ ;  $P < 0.01$ ). Changes in visceral AT but not in body fat mass or in subcutaneous AT area were significantly associated with changes in plasma glucose area ( $r = 0.37$ ;  $P < 0.05$ ). When two subgroups of women with similar mean increases in body fat mass but with either small or large increases in visceral AT were compared, the subgroup with the largest gain in visceral AT showed the greatest deterioration in indexes of plasma glucose-insulin homeostasis. On the other hand, when two subgroups with similar mean increases in visceral AT but with different changes in body fat mass were compared, both subgroups showed similar changes in plasma glucose and insulin concentrations.

**CONCLUSIONS** — Results of this 7-year follow-up study in women suggest that changes in indexes of plasma glucose-insulin homeostasis are significantly associated with changes in visceral AT, even after control for changes in body fat mass.

Cross-sectional studies have shown that abdominal obesity, especially when characterized by a preferential accumulation of visceral adipose tissue (AT), is associated with alterations in indexes of plasma glucose-insulin homeostasis in women (1–5). So far, only one prospective study in Japanese-American men (6) has demonstrated that an excess in visceral AT accumulation was associated with the subsequent development of type II diabetes over a follow-up period of 30 months. Oppert et al. (7) also

reported a deterioration of plasma glucose-insulin homeostasis after a 100-day overfeeding study, which led to significant increases in body fat mass and visceral AT. On the other hand, intervention studies have shown that weight loss was associated with improved glucose tolerance and decreased insulin concentrations (8–11). In this regard, Fujioka et al. (12) have demonstrated in women that a decrease in visceral AT accumulation obtained after 8 weeks on a low-calorie diet was accompanied by reductions in

plasma glucose and insulin levels. Leenen et al. (13) have also demonstrated that visceral fat loss obtained by dieting was associated with an improved plasma lipid-lipoprotein profile in both men and women.

Age and menopausal status are known correlates of visceral AT accumulation. It has been shown that a preferential visceral AT deposition is found with increased age (14,15) and with the occurrence of menopause (14,16). Concomitantly, glucose tolerance also tends to deteriorate with age (17–19), and when premenopausal and postmenopausal women are compared, an altered plasma glucose-insulin homeostasis is usually found in the latter group (19–21).

Obviously, additional factors such as a positive family history of diabetes also influence glucose tolerance and insulin action. In this regard, it has been reported that the prevalence of type II diabetes was increased in first-degree relatives of type II diabetic subjects (22).

The aim of the present study was to investigate the potential relationship of changes in body fatness and in visceral AT accumulation to variation in indexes of plasma glucose-insulin homeostasis observed over a 7-year follow-up period in a sample of women who were all initially premenopausal.

## RESEARCH DESIGN AND METHODS

### Subjects

Women who volunteered for this study are from a sample of premenopausal women recruited through the media who were first tested in 1986–1987 and who agreed to be retested in 1994. Women were initially recruited to examine, in a cross-sectional design, the potential associations between AT distribution measured by computed tomography (CT) and some metabolic variables predictive of cardiovascular disease risk. Cross-sectional results on this cohort have been previously reported (2,23,24). Thirty-five

From the Lipid Research Center (S.L., J.-P.D.) and Diabetes Research Unit (A.N.), Laval Medical Research Center and Physical Activity Sciences Laboratory (D.P., A.T., C.B., J.-P.D.) Laval University, Quebec, Canada.

Address correspondence and reprint requests to Jean-Pierre Després, Ph.D., Lipid Research Center, Laval University Medical Research Center, CHUL, 2705 Blvd. Laurier, Ste-Foy, Québec, Canada, G1V 4G2. E-mail: jpierres.despres@chul.ulaval.ca.

Received for publication 6 December 1995 and accepted in revised form 4 April 1996.

AT, adipose tissue; CT, computed tomography; OGTT, oral glucose tolerance test; WHR, waist-to-hip ratio.

of them were retested in 1994. These women covered a wide range of BMI values (from 19.9 to 42.0 kg/m<sup>2</sup> at baseline). Among these subjects, eight women reached menopause during the 7-year follow-up period. Three women reached natural menopause, four had a hysterectomy, and the information was missing for one woman. The duration of menopause was variable, going from 2 months to 6.5 years. Before being retested, all women were subjected to a medical examination. Four women used medication (lipid-lowering [*n* = 1], antihypertensive [*n* = 2], or hormonal supplementation [*n* = 1]), and they were kept in the study. One woman had a jejuno-ileal bypass surgery after the 1987 testing and was thus excluded. After the administration of the oral glucose tolerance test (OGTT) (as described below), it was found, according to the criteria of the National Diabetes Data Group (25), that two women had developed type II diabetes during the 7-year follow-up period, and they were excluded from the study sample. Furthermore, three women had developed impaired glucose tolerance (25), but they were kept in the study. Two women had missing values for abdominal AT areas measured by CT as well as for waist and hip circumferences in 1987 and were excluded from the analyses. The final sample on which the present paper is based included 30 women. In this group, nine women had a family history of diabetes, which was considered positive when subjects reported that at least one full sibling or parent had

diabetes. For the first 6 months of the follow-up period, 17 women were involved in an exercise training program (26). These 17 women were compared with those (*n* = 13) who did not participate in the exercise training program, and it was found that neither changes in body fat mass, visceral AT area, nor plasma glucose and insulin areas were statistically different among the two subgroups. All women signed an informed consent document before being retested, and the present protocol was approved by the Medical Ethics Committee of Laval University.

### Anthropometry and body composition

Body weight, height, and waist and hip circumferences were measured following the procedures recommended at the Airline Conference (27). Waist girth was measured at the narrowest part of the torso while the subject was standing, while the hip circumference was measured at the level of the greatest gluteal protuberance. Waist and hip circumferences were recorded to the nearest millimeter and the waist-to-hip ratio (WHR) was then calculated.

The mean of six measurements with the hydrostatic weighing technique was used to determine body density (28). Pulmonary residual volume was measured before immersion in the hydrostatic tank, using the helium dilution method of Meneely and Kaltreider (29). Percent body fat was derived from body density

using the equation of Siri (30), and body fat mass was calculated. Three women did not complete the hydrostatic weighing test and therefore, for analyses involving body fat mass, the sample size reached 27.

### CT

Visceral AT accumulation was assessed by CT, which was performed on a Siemens Somatom DRH scanner (Erlangen, Germany) as previously described (31). Briefly, subjects were examined in the supine position with both arms stretched above the head. The CT scan was performed at the abdominal level between L4 and L5 vertebrae using a radiograph of the skeleton as a reference to establish the position of the scan to the nearest millimeter. Total abdominal AT area was calculated by delineating the surface with a graph pen and then computing the AT surface using an attenuation range of -190 to -30 Hounsfield units (32,33). Abdominal visceral AT area was measured by drawing a line within the muscle wall surrounding the abdominal cavity. The abdominal subcutaneous AT area was calculated by subtracting the amount of abdominal visceral AT from the total abdominal AT area.

### OGTT

A 75-g OGTT was performed in the morning after an overnight fast. Blood samples were collected in EDTA-containing tubes (Miles Pharmaceuticals, Rexdale, Ontario, Canada) through a venous catheter from an antecubital vein at

Table 1—Characteristics of the sample of 30 women at baseline and at follow-up

| Variables                                                                     | Baseline      | Follow-up     | Changes (95% CI)         |
|-------------------------------------------------------------------------------|---------------|---------------|--------------------------|
| Age (years)                                                                   | 35.2 ± 5.6    | 42.4 ± 5.6    | 7.2 ± 0.3† (7.1–7.3)     |
| BMI (kg/m <sup>2</sup> )                                                      | 31.1 ± 6.5    | 31.4 ± 7.4    | 1.2 ± 3.9 (–0.2–2.6)     |
| Body fat mass (kg)                                                            | 32.8 ± 13.5   | 34.2 ± 16.1   | 1.9 ± 9.4 (–1.6–5.4)     |
| Waist girth (cm)                                                              | 87.8 ± 14.8   | 91.9 ± 16.2   | 4.1 ± 9.2* (0.8–7.4)     |
| WHR                                                                           | 0.80 ± 0.04   | 0.82 ± 0.06   | 0.02 ± 0.04* (0.01–0.03) |
| Abdominal AT areas                                                            |               |               |                          |
| Total (cm <sup>2</sup> )                                                      | 539.0 ± 243.7 | 578.6 ± 263.6 | 39.6 ± 135.2 (–8.8–88.0) |
| Visceral (cm <sup>2</sup> )                                                   | 98.2 ± 46.1   | 130.3 ± 64.4  | 32.1 ± 49.2† (14.5–49.7) |
| Subcutaneous (cm <sup>2</sup> )                                               | 440.8 ± 202.9 | 448.4 ± 209.9 | 7.5 ± 91.1 (–25.1–40.1)  |
| OGTT                                                                          |               |               |                          |
| Fasting glucose (mmol/l)                                                      | 5.0 ± 0.4     | 5.1 ± 0.4     | 0.2 ± 0.3† (0.1–0.3)     |
| Fasting insulin (pmol/l)                                                      | 74.0 ± 47.7   | 78.6 ± 43.2   | 4.6 ± 41.3 (–10.2–19.4)  |
| 2-h glucose (mmol/l)                                                          | 6.1 ± 1.3     | 6.9 ± 1.3     | 0.7 ± 1.7* (0.1–1.3)     |
| Glucose area (mmol · l <sup>–1</sup> · min <sup>–1</sup> ) × 10 <sup>–3</sup> | 1.14 ± 0.20   | 1.26 ± 0.20   | 0.11 ± 0.21† (0.03–0.19) |
| Insulin area (pmol · l <sup>–1</sup> · min <sup>–1</sup> ) × 10 <sup>–3</sup> | 75.0 ± 46.3   | 84.3 ± 40.9   | 9.3 ± 48.3 (–8.0–26.6)   |

Data are means ± SD; \*Significant change, *P* < 0.05; †*P* < 0.01; ‡*P* < 0.0001. For body fat mass, *n* = 27.

**Table 2—Pearson correlation coefficients for the relationships between changes in morphological variables and changes in plasma glucose and insulin levels over the 7-year follow-up period in the sample of 30 women**

|                   | 7-year changes in |             |                 |             |       |
|-------------------|-------------------|-------------|-----------------|-------------|-------|
|                   | Fat mass          | Visceral AT | Subcutaneous AT | Waist girth | WHR   |
| 7-year changes in |                   |             |                 |             |       |
| Fasting glucose   | 0.34              | 0.28        | 0.25            | 0.22        | 0.03  |
| Fasting insulin   | 0.47*             | 0.61*       | 0.51*           | 0.39†       | −0.01 |
| 2-h glucose       | 0.09              | 0.22        | 0.14            | 0.10        | −0.07 |
| Glucose area      | 0.19              | 0.37†       | 0.29            | 0.29        | 0.08  |
| Insulin area‡     | 0.47*             | 0.54*       | 0.62*           | 0.60*       | 0.35  |

\* $P < 0.01$ . † $P < 0.05$ ; ‡Spearman correlation coefficients were used. For fat mass,  $n = 27$ .

15, 0, 15, 30, 45, 60, 90, 120, 150, and 180 min for the determination of plasma glucose and insulin concentrations. Plasma glucose was measured enzymatically (34), whereas plasma insulin was measured by radioimmunoassay with polyethylene glycol separation (35). The total glucose and insulin areas under the curve during the OGTT were determined with the trapezoid method. In premenopausal women, measurements were performed while the subjects were in the early follicular phase, between the 5th and 12th day of their menstrual cycle.

### Studies on subgroups

Within the total sample, subgroups were formed according to changes in body fat mass and in visceral AT area. First, two subgroups of women ( $n = 8$  in each subgroup) with similar mean increases in body fat mass but with either small or large increases in visceral AT were formed. Second, two subgroups were formed ( $n = 8$  in each subgroup), this time with similar mean increases in visceral AT but with either small or large changes in body fat mass. These two pairing analyses were independent from each other; therefore, some women could be used for both analyses. We also made sure that the number of women who went through menopause during the 7-year follow-up period or presented a positive family history of diabetes was similar among the subgroups compared.

### Statistical analyses

Paired Student's  $t$  tests were performed to test the significance of changes in variables measured over the 7-year follow-up period within the total sample as well as

within each subgroup studied. Unpaired Student's  $t$  tests were used to compare subgroups. Pearson correlation coefficients were used to examine associations among changes observed for variables studied over the 7-year period. For variables not normally distributed, Spearman correlations were performed. Stepwise multiple regression analyses were also performed to determine independent predictors of changes in metabolic variables. The first model included changes in visceral AT and changes in body fat mass as the independent variables. In the second model, changes in visceral AT and changes in abdominal subcutaneous AT were tested as independent variables. All analyses were performed on the SAS statistical package (SAS Institute, Cary, NC).

**RESULTS**—Table 1 shows that mean changes in BMI, body fat mass, and total and subcutaneous abdominal AT areas measured by CT were not significantly different from zero, whereas waist girth

and WHR ( $P < 0.05$ ) as well as visceral AT area ( $P < 0.01$ ) significantly increased over the 7-year follow-up (Table 1). Table 1 also shows that significant increases in plasma glucose concentrations in the fasting state ( $P < 0.01$ ) and at 120 min after the glucose load ( $P < 0.05$ ) as well as in plasma glucose area ( $P < 0.01$ ) were found. Plasma insulin levels, measured either in the fasting state or after the glucose load, were not significantly altered over the 7-year period (Table 1).

Correlation coefficients were computed to study the potential relationships between changes in morphological variables and changes in indexes of plasma glucose-insulin homeostasis. Table 2 shows that changes in visceral AT, abdominal subcutaneous AT, waist girth, and body fat mass were significantly associated with changes in fasting plasma insulin levels and in the area under the curve of insulin concentrations during the OGTT ( $0.39 \leq r \leq 0.62$ ;  $0.05 > P < 0.01$ ). Changes in plasma glucose area were also significantly related to changes in visceral AT area ( $r = 0.37$ ;  $P < 0.05$ ). Changes in morphological variables and in indexes of plasma glucose-insulin homeostasis remained unaltered by the removal of the four women taking medication. Furthermore, the exclusion of these women did not alter the magnitude of the correlations between changes in morphological and metabolic variables (results not shown). Figure 1 shows that relationships between changes in visceral AT and changes in fasting insulin levels or in plasma glucose area were linear throughout the observed ranges. All other significant associations presented in Table 2 were also found to be linear (results not shown).

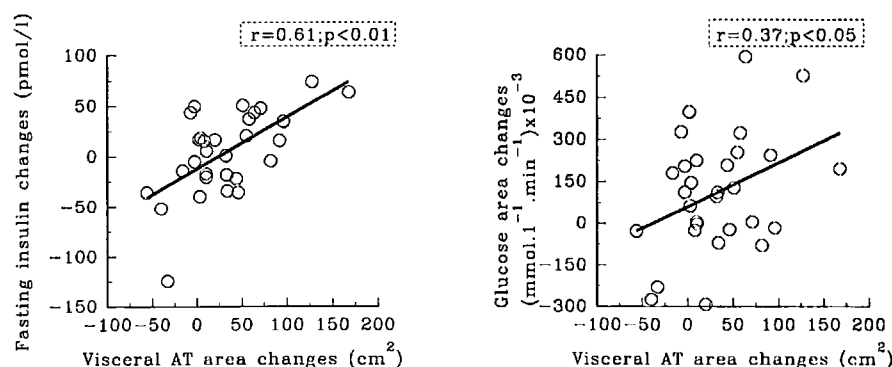

**Figure 1—Relationships between 7-year changes in visceral adipose tissue area versus changes in fasting plasma insulin levels and in plasma glucose area in the sample of 30 women.**

**Table 3—Pearson correlation coefficients for the relationships between baseline morphological variables and changes in plasma glucose and insulin levels over the 7-year follow-up period in the sample of 30 women**

|                   | Baseline morphological variables |             |                 |             |        |
|-------------------|----------------------------------|-------------|-----------------|-------------|--------|
|                   | Fat mass                         | Visceral AT | Subcutaneous AT | Waist girth | WHR    |
| 7-year changes in |                                  |             |                 |             |        |
| Fasting glucose   | −0.23                            | −0.28       | −0.23           | −0.31       | −0.36* |
| Fasting insulin   | −0.20                            | −0.30       | −0.22           | −0.24       | −0.19  |
| 2-h glucose       | 0.16                             | 0.10        | 0.14            | 0.10        | −0.04  |
| Glucose area      | 0.04                             | −0.03       | −0.06           | 0.10        | −0.04  |
| Insulin area†     | −0.02                            | −0.03       | −0.26           | −0.10       | −0.24  |

\* $P < 0.05$ . †Spearman correlation coefficients were used. For fat mass,  $n = 27$ .

Table 3 indicates that no significant associations were found between baseline values of morphological variables and 7-year changes in plasma glucose and insulin levels, except for WHR measured at baseline, which was negatively and significantly related to changes in fasting glucose levels ( $r = -0.36$ ;  $P < 0.05$ ).

When women who became postmenopausal were removed from the study sample, changes in body fat mass, visceral AT, and waist girth remained significant correlates of changes in fasting insulin and in plasma insulin area, whereas variations in plasma glucose area were no longer significantly related to changes in visceral AT. Changes in waist girth, WHR, and visceral AT area remained significant when only premenopausal women were considered. However, the mean change in plasma glucose area was of lower magnitude ( $0.07$  compared with  $0.11$  [ $\text{mmol} \cdot \text{l}^{-1} \cdot \text{min}^{-1}$ ]  $\times 10^{-3}$  in the total sample) when postmenopausal women were excluded, and the change was no longer sta-

tistically significant ( $P = 0.12$ ) (results not shown).

To further discriminate the importance of changes in body fat mass versus changes in visceral AT on plasma glucose-insulin homeostasis, we have paired, on a group basis, women with similar body fat mass increases but with either small or large increases in visceral AT. Subgroup characteristics are presented in Table 4. Figure 2 shows plasma glucose and insulin levels during the OGTT in the two subgroups. No difference in glucose and insulin levels measured in 1987 were found between the two subgroups. However, women with large increases in visceral AT showed significant increases in plasma glucose levels in the fasting state and at 15, 45, and 60 min after the glucose load. Trends for a significant increase in glucose levels at 30 min ( $P = 0.07$ ) and in plasma glucose area ( $P = 0.08$ ) were also observed. Fasting insulin levels were increased at follow-up compared with baseline ( $P = 0.06$ ) in women showing large gains in visceral AT. In comparison,

women with small gains in visceral AT did not show any significant increase in either plasma glucose or insulin levels. On the other hand, we have also paired, on a group basis, women with similar changes in visceral AT but with either small or large gains in body fat mass. Table 5 shows that the subgroup referred to as low body fat mass gainers actually presented a mean decrease in body fat mass. It can be noted in Table 5 that the difference between the two subgroups for changes in subcutaneous AT area did not reach statistical significance ( $P = 0.20$ ). No differences in plasma glucose and insulin levels measured at baseline were found between the two groups. Figure 3 shows that women with large gains in body fat mass showed significant increases in plasma glucose levels in the fasting state and at 15 min after glucose ingestion. No changes in plasma insulin concentrations were observed among this subgroup. Women with small gains in body fat mass also showed some significant changes in plasma glucose levels during the follow-up (fasting, 15, 90, and 120 min), and their plasma glucose area was also significantly increased. A significant increase in plasma insulin levels at 15 min was also observed among small gainers of body fat mass. Comparison of these two subgroups of women (low versus high body fat mass gainers) revealed that there was no difference in 7-year changes in plasma glucose or insulin levels between the two groups (results not shown). Women were also paired to form two subgroups displaying a significant difference in abdominal subcutaneous AT changes (low or high subcutaneous AT gains) but no difference in visceral AT changes, and results were similar to those

**Table 4—Characteristics of the two subgroups of women with similar increases in body fat mass over the 7-year follow-up period but with either small or large gains in visceral adipose tissue**

| Variables                              | Low visceral AT gain |                  | High visceral AT gain |                  |
|----------------------------------------|----------------------|------------------|-----------------------|------------------|
|                                        | Baseline             | Changes          | Baseline              | Changes          |
| Age (years)                            | 33.0 $\pm$ 4.6       | 7.3 $\pm$ 0.3    | 37.1 $\pm$ 6.3        | 7.2 $\pm$ 0.4    |
| Body fat mass (kg)                     | 34.4 $\pm$ 15.9      | 1.6 $\pm$ 8.0    | 30.5 $\pm$ 13.2       | 1.3 $\pm$ 7.6    |
| Subcutaneous AT area ( $\text{cm}^2$ ) | 494.6 $\pm$ 232.5    | −14.4 $\pm$ 57.2 | 375.3 $\pm$ 191.8     | 6.6 $\pm$ 92.5   |
| Visceral AT area ( $\text{cm}^2$ )     | 99.9 $\pm$ 49.9      | 3.8 $\pm$ 39.1   | 84.6 $\pm$ 30.5       | 50.6 $\pm$ 44.3* |
| Family history of diabetes             |                      | 2/8              |                       | 3/8              |
| Menopausal at follow-up                |                      | 2/8              |                       | 3/8              |

Data are means  $\pm$  SD. \*Significant difference between the two subgroups,  $P = 0.04$ . In each subgroup,  $n = 8$ .



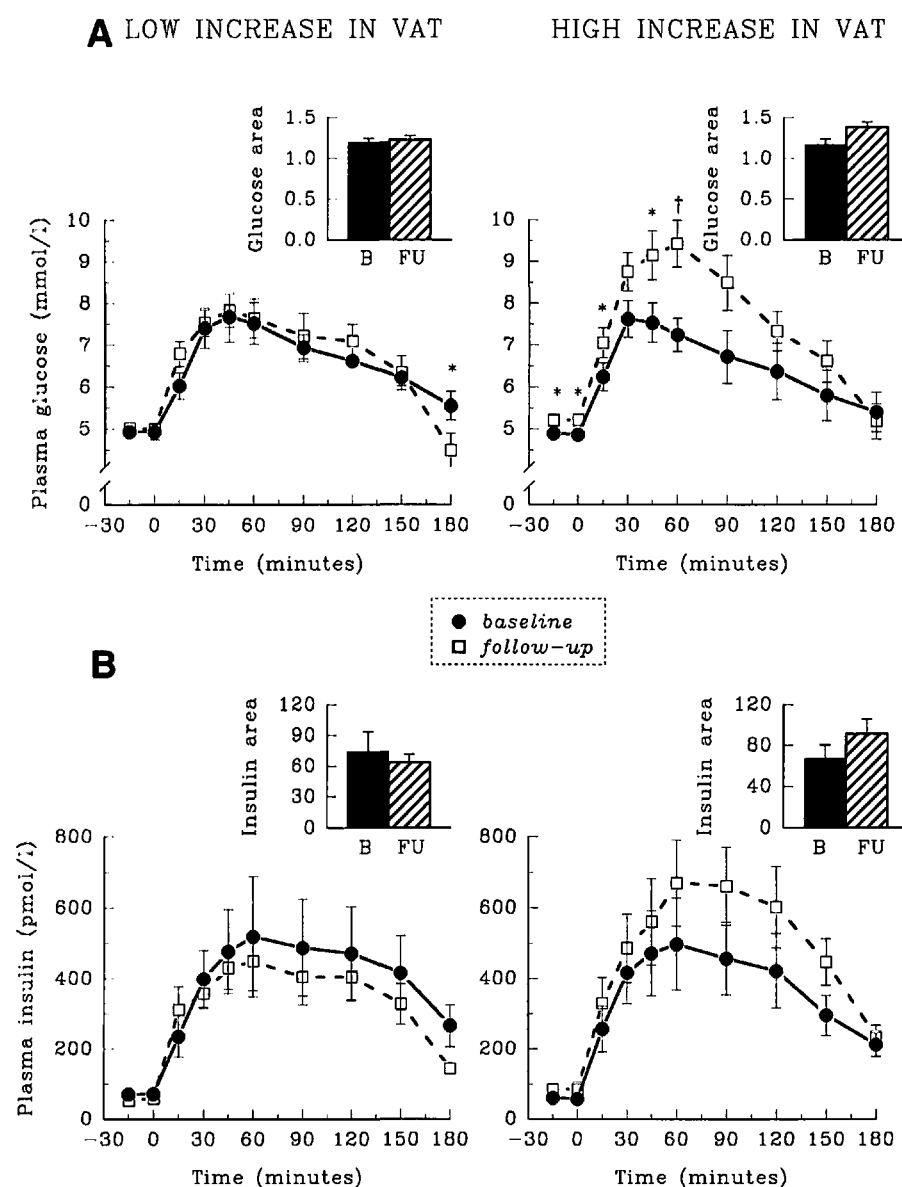

**Figure 2**—Plasma glucose (A) and insulin (B) concentrations in the fasting state and during the OGTT in two subgroups of eight women showing similar increases in body fat mass but with small versus large gains in visceral adipose tissue area over the 7-year follow-up period. Bar charts show plasma glucose ( $\text{mmol} \cdot \text{l}^{-1} \cdot \text{min}^{-1}$ )  $\times 10^{-3}$  and insulin areas ( $\text{pmol} \cdot \text{l}^{-1} \cdot \text{min}^{-1}$ )  $\times 10^{-3}$ . B, baseline; FU, follow-up; VAT, visceral adipose tissue. Significant changes between baseline and follow-up: \* $P < 0.05$ , † $P < 0.01$ .

obtained when low and high body fat mass gainers were compared (not shown).

Finally, results of stepwise multiple regression analyses are presented in Table 6. When changes in body fat mass and changes in visceral AT were introduced in the model as independent variables, it was found that the change in visceral AT was the only significant predictor of changes in metabolic variables studied (changes in plasma glucose area, fasting insulin levels, and insulin area). When changes in subcutaneous and in visceral AT areas were studied as independent variables, it was found that visceral AT change was the only independent predictor of changes in plasma glucose area and in fasting insulin levels. On the other hand, the change in abdominal subcutaneous AT was an independent predictor of changes in plasma insulin area whereas visceral AT changes did not significantly improve the explained variance of this model.

**CONCLUSIONS**—Overall, women gained visceral AT during this 7-year follow-up study. This result is concordant with the notion that visceral AT deposition generally increases with age (14,15). In accordance with previous results (17–19), glucose tolerance, assessed by plasma glucose area in the present study, also generally deteriorated over the years. Our results also showed that changes in both body fat mass, abdominal subcutaneous AT, and in visceral AT were significantly associated with changes in plasma insulin levels (either fasting or after the glucose load). However, only changes in visceral AT were significantly correlated with changes in the area under the curve of plasma glucose concentrations. This finding suggests that it is the specific enlargement of the visceral fat depot, rather

**Table 5**—Characteristics of the two subgroups of women with similar increases in visceral AT over the 7-year follow-up period but with either small or large gains in body fat mass

| Variables                              | Low body fat mass gain |                  | High body fat mass gain |                 |
|----------------------------------------|------------------------|------------------|-------------------------|-----------------|
|                                        | Baseline               | Changes          | Baseline                | Changes         |
| Age (years)                            | 35.5 $\pm$ 7.1         | 7.3 $\pm$ 0.2    | 34.7 $\pm$ 6.2          | 7.2 $\pm$ 0.4   |
| Body fat mass (kg)                     | 33.3 $\pm$ 16.1        | −2.7 $\pm$ 9.0   | 34.9 $\pm$ 13.8         | 5.5 $\pm$ 7.1*  |
| Subcutaneous AT area ( $\text{cm}^2$ ) | 434.3 $\pm$ 217.3      | −33.2 $\pm$ 92.6 | 499.0 $\pm$ 217.9       | 25.1 $\pm$ 84.0 |
| Visceral AT area ( $\text{cm}^2$ )     | 106.1 $\pm$ 60.1       | 22.2 $\pm$ 45.4  | 97.4 $\pm$ 50.2         | 26.5 $\pm$ 40.4 |
| Family history of diabetes             |                        | 3/8              |                         | 2/8             |
| Menopausal at follow-up                |                        | 2/8              |                         | 3/8             |

Data are means  $\pm$  SD. \*Significant difference between the two subgroups,  $P = 0.07$ . In each subgroup,  $n = 8$ .

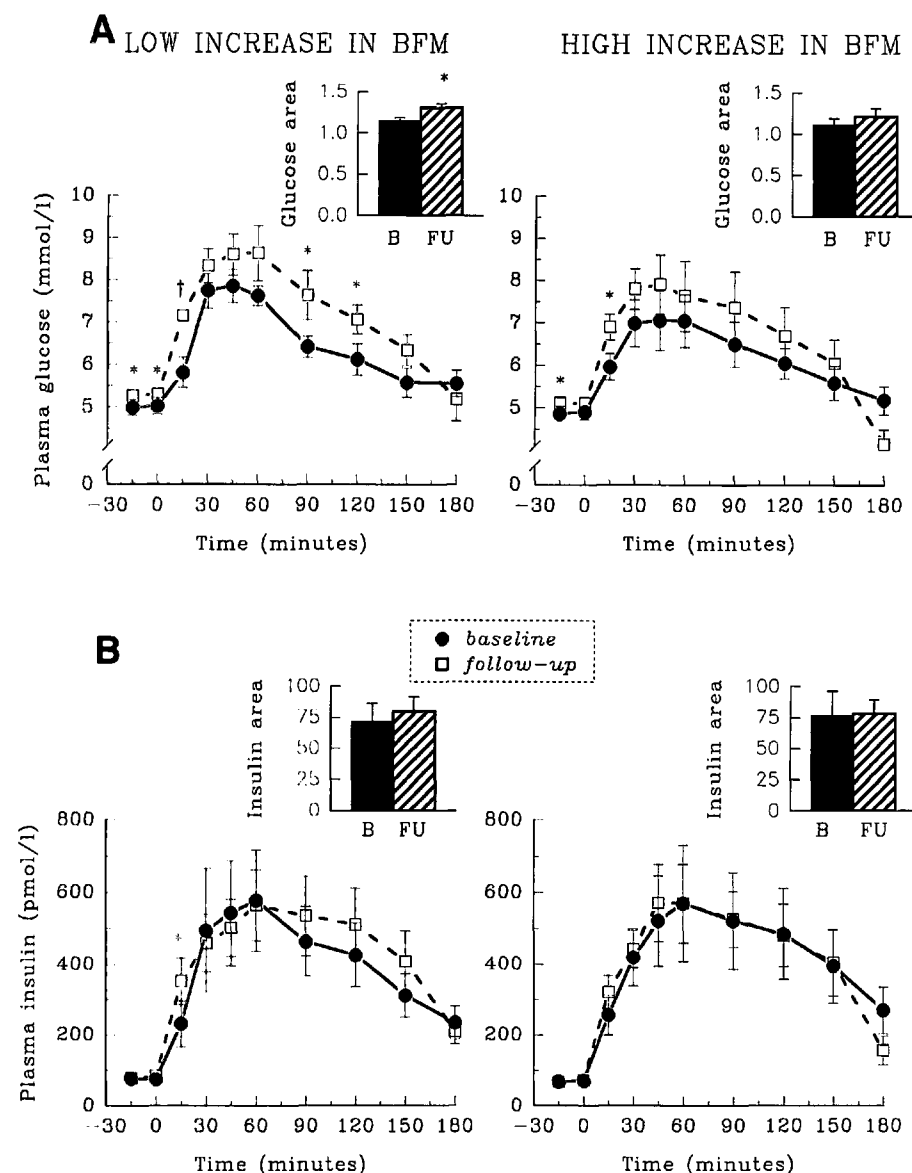

**Figure 3**—Plasma glucose (A) and insulin (B) concentrations in the fasting state and during the OGTT in two subgroups of eight women showing similar increases in visceral adipose tissue area but with small versus large gains in body fat mass over the 7-year follow-up period. Bar charts show plasma glucose ( $\text{mmol} \cdot \text{l}^{-1} \cdot \text{min}^{-1} \times 10^{-3}$ ) and insulin areas ( $\text{pmol} \cdot \text{l}^{-1} \cdot \text{min}^{-1} \times 10^{-3}$ ). B, baseline; FU, follow-up; BFM, body fat mass. Significant changes between baseline and follow-up: \* $P < 0.05$ , + $P < 0.01$ .

than the absolute gain in body fat, that increases the risk of developing glucose intolerance in this group of women. Our results also indicate that the relationships between changes in visceral AT area and changes in indexes of plasma glucose-insulin homeostasis were linear throughout the observed ranges. These results suggest that women who have lost visceral AT were as likely to improve their plasma glucose-insulin homeostasis as women who gained visceral AT were to deteriorate their metabolic profile.

Changes in waist girth were signif-

icantly associated with changes in plasma insulin levels in the fasting state and after the glucose load, a finding that further supports the notion that waist girth is a useful correlate of the metabolic risk, as previously suggested in cross-sectional analyses where waist girth was found to be associated with plasma glucose and insulin levels as well as with plasma lipid-protein concentrations (36). Changes in WHR, however, did not appear to adequately reflect the variation found in plasma glucose-insulin homeostasis in this sample of women.

Another finding that deserves some discussion in the present study is the lack of prospective association between baseline values of morphological variables and subsequent changes in plasma glucose and insulin levels. This suggests that women with high initial levels of body fat and visceral AT were not more susceptible to show a subsequent deterioration in plasma glucose-insulin homeostasis and that it was the variation rather than the initial levels of body fat mass and visceral AT that predicted changes in plasma glucose-insulin homeostasis. These results are quite important from a clinical point of view since they emphasize the importance of intervention strategies aiming at reducing body fat mass and visceral AT levels to obtain improvement in plasma glucose-insulin homeostasis.

One of the objectives of the present study was to discriminate between the effect of changes in body fatness and changes in visceral AT on the variation in plasma glucose-insulin homeostasis noted over the 7-year follow-up period. Our results indicate that the subsample of women with the largest increase in visceral AT showed significant deterioration in their indexes of plasma glucose-insulin homeostasis. Women with small gains in visceral AT, although having increases in body fat mass and in subcutaneous AT areas similar to those with large visceral AT gains, did not show, however, significant alterations in their plasma glucose and insulin levels. These results suggest that the specific deposition of visceral AT explained to a larger extent the variation in indexes of plasma glucose-insulin homeostasis than the absolute or subcutaneous accumulation of body fat. To further explore this possibility, additional analyses were performed in which women with similar increases in visceral AT but with either small or large increases in body fat mass or in abdominal subcutaneous AT were compared. The two subgroups showed about similar changes in plasma glucose levels, whereas plasma insulin levels essentially did not change during the 7-year follow-up period in the two subgroups. This suggests that as long as the visceral AT deposition is controlled, the concomitant variation of body fat mass or subcutaneous AT should have trivial effects on plasma glucose-insulin homeostasis. Menopause status and family history of diabetes are not

**Table 6—Stepwise multiple regression analyses for the prediction of changes in plasma glucose area, fasting plasma insulin levels, and plasma insulin area in the sample of 30 women**

|                          | Variance explained  |                        |                     |
|--------------------------|---------------------|------------------------|---------------------|
|                          | 7-year changes in:  |                        |                     |
|                          | Plasma glucose area | Fasting plasma insulin | Plasma insulin area |
| Variables entered        |                     |                        |                     |
| Model 1                  |                     |                        |                     |
| Visceral AT area (%)     | 18.0*               | 35.8‡                  | 37.8‡               |
| Body fat mass (%)        | 8.1                 | 0.3                    | 0.0                 |
| Model 2                  |                     |                        |                     |
| Visceral AT area (%)     | 13.6*               | 37.4‡                  | 1.6                 |
| Subcutaneous AT area (%) | 0.2                 | 0.0                    | 34.4‡               |

\*For model 1,  $n = 27$ . †Independent predictor,  $P < 0.05$ ; ‡ $P < 0.001$ .

likely to have influenced the results reported herein since we made sure to have a similar number of postmenopausal women and women displaying a positive family history of diabetes in each subgroup analyzed.

Results from stepwise multiple regression analyses confirmed those obtained by pairing analyses, as the change in visceral AT was found to be an independent predictor of changes in plasma glucose-insulin homeostasis whereas the change in body fat mass did not significantly improve the explained variance for any of the metabolic variables studied. When subcutaneous AT area changes were entered into the model instead of body fat mass, results obtained were somewhat different. In fact, changes in abdominal subcutaneous AT were found to be a better predictor of changes in plasma insulin area than were visceral AT changes.

Results of the present study are concordant with previous cross-sectional observations, which have used the WHR to distinguish between upper body obesity and lower body obesity. Kissebah et al. (37) and Evans et al. (38) have demonstrated that upper body obesity was associated with a deterioration in glucose tolerance and hyperinsulinemia. We have also previously demonstrated that when obese women matched for the percentage of body fat but having either low or high levels of visceral AT assessed by CT were compared, significant alterations in plasma glucose and insulin levels were found in obese patients with high levels of

visceral AT compared with those with low levels of visceral AT (2). It has therefore been suggested that the effect of upper body obesity on plasma glucose-insulin homeostasis was independent from and additive to the effect of obesity per se. More specifically, some studies have reported that upper body obesity was associated with a decreased hepatic clearance of insulin whereas obesity per se was rather related to an increased insulin secretion (2,39,40). These previous observations are concordant with our findings, which underlined the potential independent contribution of subcutaneous AT changes in the prediction of changes in plasma insulin area. In the present study, changes in plasma insulin area probably reflected to a large extent the adaptation of insulin secretion. Unfortunately, plasma C-peptide levels, which would have provided a more precise estimation of insulin secretion, were not measured in this study. At this point, it should be pointed out, however, that results obtained from stepwise multiple regression models should be interpreted with caution since visceral AT changes displayed a high level of collinearity with changes in both body fat and subcutaneous AT area.

Overall, the exclusion from the study sample of women who went through menopause during the 7-year follow-up period did not substantially affect the outcome of the analyses with the exception of the association between changes in visceral AT and changes in plasma glucose area, which was no longer significant when only premenopausal

women were considered. The interaction between menopause status and visceral AT accumulation on glucose tolerance is an issue that will clearly need more attention because our study was not designed to specifically examine the effect of menopause on plasma glucose-insulin homeostasis. Our group of women who went through menopause during the follow-up was rather small ( $n = 8$ ) and heterogeneous with regard to the duration of menopause. Furthermore, some women reached natural menopause whereas other had a hysterectomy. Considering these limitations, it was difficult to draw specific conclusions on this subgroup of women, and further studies on larger and more homogeneous samples of postmenopausal women are clearly warranted.

In summary, results of the present study have shown that changes in body fat mass and in visceral AT observed over a 7-year follow-up period were significantly and positively associated with changes in most indexes of plasma glucose-insulin homeostasis. When subgroups of women with similar changes in body fat mass and in abdominal subcutaneous AT but with either small or large gains in visceral AT were compared, it was found that the latter subgroup showed a significant deterioration in plasma glucose-insulin homeostasis whereas women with small gains in visceral AT showed no deterioration in their metabolic profile.

**Acknowledgments**—This study was supported by the Canadian Diabetes Association. S. L. is a fellow of the Medical Research Council of Canada.

We would like to express our gratitude to the subjects for their excellent collaboration and to the staff of the Lipid Research Center, the Physical Activity Sciences Laboratory, and the Diabetes Research Unit for their contribution to this study. We especially want to thank S. Brulotte, A. Lauzier, J. Maheux, M.F. Verdon, and H. Bessette and C. Leblanc for their help in the collection and analysis of the data. The dedicated work of Y. Montreuil, M. Martin, and R. Duchesne is also acknowledged.

## References

1. Fujioka S, Matsuzawa Y, Tokunaga K, Faruqi S: Contribution of intra-abdominal fat accumulation to the impairment of glu-

- cosc and lipid metabolism in human obesity. *Metabolism* 36:54–59, 1987
2. Després JP, Nadeau A, Tremblay A, Ferland M, Moorjani S, Lupien PJ, Thériault G, Pinault S, Bouchard C: Role of deep abdominal fat in the association between regional adipose tissue distribution and glucose tolerance in obese women. *Diabetes* 38:304–309, 1989
3. Peiris AN, Sothmann MS, Hennes MI, Lee MB, Wilson CR, Gustafson AB, Kissebah AH: Relative contribution of obesity and body fat distribution to alterations in glucose insulin homeostasis: predictive values of selected indices in premenopausal women. *Am J Clin Nutr* 49:758–764, 1989
4. Pouliot MC, Després JP, Nadeau A, Tremblay A, Moorjani S, Lupien PJ, Thériault G, Bouchard C: Associations between regional body fat distribution, fasting plasma free fatty acid levels and glucose tolerance in premenopausal women. *Int J Obes* 14:293–302, 1990
5. Bonora E, Del Prato S, Bonadonna RC, Gulli G, Solini A, Shank ML, Ghiatas AA, Lancaster JL, Kilcoyne RF, Alyassin AM, DeFronzo RA: Total body fat content and fat topography are associated differently with in vivo glucose metabolism in non-obese and obese nondiabetic women. *Diabetes* 41:1151–1159, 1992
6. Bergstrom RW, Newell-Morris LL, Leonetti DL, Shuman WP, Wahl PW, Fujimoto WY: Association of elevated fasting C-peptide level and increased intra-abdominal fat distribution with development of NIDDM in Japanese-American men. *Diabetes* 39:104–111, 1990
7. Oppert JM, Nadeau A, Tremblay A, Després JP, Thériault G, Dériaux O, Bouchard C: Plasma glucose, insulin, and glucagon before and after long-term overfeeding in identical twins. *Metabolism* 44:96–105, 1995
8. Golay A, Felber JP, Dusmet M, Gomez F, Curchod B, Jéquier E: Effect of weight loss on glucose disposal in obese and obese diabetic patients. *Int J Obes* 9:181–190, 1985
9. Pascale RW, Wing RR, Blair EH, Harvey JR, Guare JC: The effect of weight loss on change in waist-to-hip ratio in patients with type II diabetes. *Int J Obes* 16:59–65, 1992
10. Goldstein DJ: Beneficial effects of modest weight loss. *Int J Obes* 16:397–415, 1992
11. Wing RR, Jefferey RW: Effect of modest weight loss on changes in cardiovascular risk factors: are there differences between men and women or between weight loss and maintenance? *Int J Obes* 19:67–73, 1995
12. Fujioka S, Matsuzawa Y, Tokunaga K, Kawamoto T, Kobatake T, Keno Y, Kotani K, Yoshida S, Tarui S: Improvement of glucose and lipid metabolism associated with selective reduction of intra-abdominal visceral fat in premenopausal women with visceral fat obesity. *Int J Obes* 15:853–859, 1991
13. Leenen R, van der Kooy K, Droop A, Seidell JC, Deurenberg P, Weststrate JA, Hautvast JGAJ: Visceral fat loss measured by magnetic resonance imaging in relation to changes in serum lipid levels of obese men and women. *Arterioscler Thromb* 13:487–494, 1993
14. Enzi G, Gasparo M, Biondetti PR, Fiore D, Semisa M, Zurlo F: Subcutaneous and visceral fat distribution according to sex, age, and overweight, evaluated by computed tomography. *Am J Clin Nutr* 44:739–746, 1986
15. Kotani K, Tokunaga K, Fujioka S, Kobatake T, Keno Y, Yoshida S, Shimomura I, Tarui S, Matsuzawa Y: Sexual dimorphism of age-related changes in whole-body fat distribution in the obese. *Int J Obes* 18:207–212, 1994
16. Zamboni M, Armellini F, Milani MP, De Marchi M, Todesco T, Robbi R, Bergamo-Andreis IA, Bosello O: Body fat distribution in pre- and post-menopausal women: metabolic and anthropometric variables and their inter-relationships. *Int J Obes* 16:495–504, 1992
17. Harris MI, Hadden WC, Knowler WC, Bennett PH: Prevalence of diabetes and impaired glucose tolerance and plasma glucose levels in U.S. population aged 20–74 yr. *Diabetes* 36:523–534, 1987
18. Jackson RA, Hawa MI, Roshania RD, Sim BM, Disilvio L, Jaspan JB: Influence of aging on hepatic and peripheral glucose metabolism in humans. *Diabetes* 37:119–129, 1988
19. Preziosi P, Barrett-Connor E, Papoz L, Roger M, Saint-Paul M, Nahoul K, Simon D: Interrelation between plasma sex hormone-binding globulin and plasma insulin in healthy adult women: The Telecom Study. *J Clin Endocrinol Metab* 76:283–287, 1993
20. Rebuffé-Scrive M, Eldh J, Hafström LO, Björntorp P: Metabolism of mammary, abdominal, and femoral adipocytes in women before and after menopause. *Metabolism* 35:792–797, 1986
21. Lindheim SR, Presser SC, Dittkoff EC, Vijod MA, Stanczyk FZ, Lobo RA: A possible bimodal effect of estrogen on insulin sensitivity in postmenopausal women and the attenuation effect of added progestin. *Fertil Steril* 60:664–667, 1993
22. Rich SS: Mapping genes in diabetes: genetic epidemiological perspective. *Diabetes* 39:1315–1319, 1990
23. Després JP, Moorjani S, Ferland M, Tremblay A, Lupien PJ, Nadeau A, Pinault S, Thériault G, Bouchard C: Adipose tissue distribution and plasma lipoprotein levels in obese women: importance of intra-abdominal fat. *Arteriosclerosis* 9:203–210, 1989
24. Ferland M, Després J-P, Nadeau A, Moorjani S, Tremblay A, Lupien PJ, Thériault G, Bouchard C: Contribution of glucose tolerance and plasma insulin levels to the relationships between body fat distribution and plasma lipoprotein levels in women. *Int J Obes* 15:677–688, 1991
25. National Diabetes Data Group: Classification and diagnosis of diabetes mellitus and other categories of glucose intolerance. *Diabetes* 28:1039–1057, 1979
26. Lamarche B, Després JP, Pouliot MC, Moorjani S, Lupien PJ, Thériault G, Tremblay A, Nadeau A, Bouchard C: Is body fat loss a determinant factor in the improvement of carbohydrate and lipid metabolism following aerobic exercise training in obese women? *Metabolism* 41:1249–1256, 1992
27. The Airlie (VA) consensus conference. In *Standardization of Anthropometric Measurements*. Lohman T, Roche A, Martorel R, Eds. Champaign, IL, Human Kinetics, 1988, p. 39–80
28. Behnke AR, Wilmore JH: *Evaluation and Regulation of Body Build and Composition*. Englewood Cliffs, NJ, Prentice-Hall, 1974
29. Meneely GR, Kaltreider NL: Volume of the lung determined by helium dilution. *J Clin Invest* 28:129–139, 1949
30. Siri WE: The gross composition of the body. *Adv Biol Med Phys* 4:239–280, 1956
31. Ferland M, Després JP, Tremblay A, Pinault S, Nadeau A, Moorjani S, Lupien PJ, Thériault G, Bouchard C: Assessment of adipose tissue distribution by computed axial tomography in obese women: association with body density and anthropometric measurements. *Br J Nutr* 61:139–148, 1989
32. Sjöström L, Kvist H, Cederblad A, Tylen U: Determination of total adipose tissue and body fat in women by computed tomography, 40K and tritium. *Am J Physiol* 250:E736–E745, 1986
33. Kvist H, Sjöström L, Tylen U: Adipose tissue volume determination in women by computed tomography: technical considerations. *Int J Obes* 10:53–67, 1986
34. Richterich R, Dauwalder H: Zur bestimmung der plasmaglukosekonzentration mit der hexokinase-glucose-6-phosphat-dehydrogenase-methode. *Schweiz Med Wochenschr* 101:615–618, 1971
35. Desbuquois B, Aurbach GD: Use of polyethylene glycol to separate free and antibody-bound peptide hormones in radioimmunoassays. *J Clin Endocrinol Metab* 37:732–738, 1971
36. Pouliot MC, Després JP, Lemieux S, Moorjani S, Bouchard C, Tremblay A, Nadeau A, Lupien PJ: Waist circumference and abdominal sagittal diameter: best simple anthropometric indexes of ab-

- dominal visceral adipose tissue accumulation and related cardiovascular risk in men and women. *Am J Cardiol* 73:460–468, 1994
37. Kissebah AH, Vydelingum N, Murray R, Evans DJ, Hartz AJ, Kalkhoff RK, Adams PW: Relation of body fat distribution to metabolic complications of obesity. *J Clin Endocrinol Metab* 54:254–260, 1982
  38. Evans DJ, Hoffman RG, Kalkhoff RK, Kissebah AH: Relationship of body fat topography to insulin sensitivity and metabolic profiles in premenopausal women. *Metabolism* 33:68–75, 1984
  39. Peiris A, Mueller RA, Smith GA, Struve MF, Kissebah AH: Splanchnic insulin metabolism in obesity: influence of body fat distribution. *J Clin Invest* 78:1648–1657, 1986
  40. Peiris AN, Struve MF, Kissebah AH: Relationship of body fat distribution to the metabolic clearance of insulin in premenopausal women. *Int J Obes* 11:581–589, 1987

# Be Part of the Team Coming Close to the Cure Join the American Diabetes Association

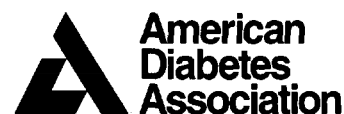

**1.** Name: \_\_\_\_\_  
Address: \_\_\_\_\_ City \_\_\_\_\_ State \_\_\_\_\_ Zip \_\_\_\_\_  
Degrees: \_\_\_\_\_ / \_\_\_\_\_ Home Phone \_\_\_\_\_ Office \_\_\_\_\_ Fax \_\_\_\_\_

**2.** Primary Area of Focus: \_\_\_\_\_ Clinical Practice \_\_\_\_\_ Research \_\_\_\_\_ Education \_\_\_\_\_ Industry \_\_\_\_\_

## 3. Choose Your Membership Category

### Category I: Recommended for Physicians

#### Dues:

- ☐ Domestic Members: \$125      ☐ Overseas Members: \$180  
☐ Domestic in Training Dues: \$65      ☐ Overseas in Training Dues: \$95

#### Journal Selection (choose one):

- ☐ Diabetes (monthly): Basic research on the pathophysiology of diabetes  
☐ Diabetes Care (monthly): Clinical care and research

### Category II:

#### Dues:

- ☐ Domestic Members: \$75      ☐ Overseas Members: \$115  
☐ Domestic in Training Dues: \$38      ☐ Overseas in Training Dues: \$45

#### Journals (includes journals listed below):

Diabetes Spectrum (quarterly): Education and counseling strategies

Diabetes Forecast (monthly): Lifestyle magazine for patients and their families

*\*If you received your first professional degree, diploma, or certificate in the last five years, you qualify for 50% savings offered with In-Training Membership. Just fill out information below.*

University or college attended: \_\_\_\_\_ Degree(s) \_\_\_\_\_ Date Earned: \_\_\_\_\_

## 4. Order Additional Publications at "Members-only" Rates: Domestic/International Rates (only single subscriptions available for each of the following journals)

- ☐ Diabetes Care (monthly) <sup>Dom/Int'l</sup> \$75/\$130      ☐ Diabetes Reviews (quarterly) <sup>Dom/Int'l</sup> \$45/\$65      ☐ Diabetes Spectrum (quarterly) <sup>Dom/Int'l</sup> \$30/\$45      ☐ 1996 Abstract Book (annual) <sup>Dom/Int'l</sup> \$10/\$18  
☐ Diabetes (monthly) \$75/\$130      ☐ Clinical Diabetes (bi-monthly) \$15/\$21      ☐ Diabetes Forecast (monthly) \$12/\$37

## 5. Select One FREE Council Membership:

Extra Council Memberships are \$25 each.

- ☐ Behavioral Medicine and Psychology (PP)  
☐ Diabetes in Pregnancy (BB)  
☐ Complications (TT)  
☐ Education (SS)  
☐ Exercise (XX)  
☐ Foot Care (RR)  
☐ Molecular, Cellular and Biochemical Aspects of Diabetes (MM)  
☐ Clinical Endocrinology, Health Care Delivery and Public Health (FF)  
☐ Diabetes in Youth (EE)  
☐ Epidemiology and Statistics (CC)  
☐ Immunology, Immunogenetics and Transplantation (JJ)  
☐ Nutritional Sciences and Metabolism (NN)

## 7. Circle one Primary (P) and one Secondary (S) Specialty

- |                            |                        |                                |
|----------------------------|------------------------|--------------------------------|
| P S AD Administration      | P S IU Immunology      | P S PH Public Health           |
| P S BC Biochemistry        | P S ME Metabolism      | P S PM Pharmacy                |
| P S CA Cardiology          | P S NE Nephrology      | P S PN Pediatric Endocrinology |
| P S DE Dermatology         | P S NR Neurology       | P S PO Podiatry                |
| P S DO Dentistry           | P S NS Nursing         | P S PR Podiatric Management    |
| P S ED Education           | P S NU Nutrition       | P S PS Psychiatry              |
| P S EN Adult Endocrinology | P S OG Obstetrics/Gyn. | P S PT Pathology               |
| P S EP Epidemiology        | P S OP Ophthalmology   | P S PX Physical Therapy        |
| P S EX Exercise Physiology | P S OR Orthopedics     | P S PY Physiology              |
| P S FP Family Practice     | P S OS Osteopathy      | P S SU Surgery                 |
| P S GE Geriatrics          | P S OT Optometry       | P S SW Social Work             |
| P S GP General Practice    | P S PA Pharmacology    | P S UR Urology                 |
| P S GT Genetics            | P S PC Psychology      |                                |
| P S IM Internal Medicine   | P S PE Pediatrics      |                                |

## 8. Enclose Payment and Mail Today!

- ☐ New Membership or ☐ Renewing Membership      ☐ Check: payable to the American Diabetes Association  
Member Dues: \_\_\_\_\_      ☐ Charge my ☐ VISA ☐ MasterCard  
Category I \$ \_\_\_\_\_ or Category II \$ \_\_\_\_\_      ☐ American Express

Additional Subscriptions: \$ \_\_\_\_\_ \$ \_\_\_\_\_      Account No. # \_\_\_\_\_

Additional Councils \_\_\_\_\_ x \$25 = \_\_\_\_\_      Expiration Date \_\_\_\_\_

Taxes: Canadians must add 7% GST tax \$ \_\_\_\_\_      Date: \_\_\_\_\_ Signature \_\_\_\_\_

TOTAL ENCLOSED: \$ \_\_\_\_\_

JMAD995

Dues amount set aside for publications are:

- Category I (Diabetes or Diabetes Care): \$75
- Category II (Diabetes Spectrum): \$30 (Diabetes Forecast): \$12

Payment Options: Mail payment and application to:

Professional Section Membership  
1660 Duke Street  
Alexandria, VA 22314

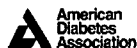

For fast service, call or send a fax to our membership department:

Phone: (703) 549-1500

Fax: (703) 549-6995.

Allow 4-6 weeks to process your order. Prices are subject to change. Payment must accompany order in US funds drawn on US bank.

## 6. Mark Your Primary Work Setting:

- ☐ University/Academic (1)  
☐ Private/Group Practice (2)  
☐ Hospital (3)  
☐ HMO (4)  
☐ Public Health (5)  
☐ Government (7)  
☐ Pharmacy (8)  
☐ Pharmaceutical/Manufacturing (9)  
☐ Nursing Home (10)  
☐ Home Health (11)

# DUALITY OF INTEREST DISCLOSURE FORM FOR AUTHORS OF ARTICLES IN AMERICAN DIABETES ASSOCIATION PUBLICATIONS

I have read the American Diabetes Association's Duality of Interest Policy Statement (found in the January and July issues of *Diabetes* and *Diabetes Care*), and I am indicating below that I have or have not had in the previous 12 months a relevant duality of interest with a company whose products or services are *directly* related to the subject matter of my manuscript. A relevant duality of interest includes employment, membership on the board of directors or any fiduciary relationship, membership on a scientific advisory panel or other standing scientific/medical committee, ownership of stock, receipt of honoraria or consulting fees, or receipt of financial support or grants for research. Company is defined as a for-profit concern engaged in the development, manufacture, or sale of pharmaceutical or biomedical devices or supplies.

**Each author must sign this form.** (The form may be photocopied if needed.)

|                                                                           | Check each area that applies |       |       |       |       |       |
|---------------------------------------------------------------------------|------------------------------|-------|-------|-------|-------|-------|
|                                                                           | Yes                          | No    | Yes   | No    | Yes   | No    |
| Employment                                                                | _____                        | _____ | _____ | _____ | _____ | _____ |
| Membership on an advisory panel, standing committee or board of directors | _____                        | _____ | _____ | _____ | _____ | _____ |
| Stock shareholder                                                         | _____                        | _____ | _____ | _____ | _____ | _____ |
| Honoraria or consulting fees                                              | _____                        | _____ | _____ | _____ | _____ | _____ |
| Grant/research support                                                    | _____                        | _____ | _____ | _____ | _____ | _____ |
| Author (please type or print)                                             | _____                        |       | _____ |       | _____ |       |
| Signature                                                                 | _____                        |       | _____ |       | _____ |       |
| Date                                                                      | _____                        |       | _____ |       | _____ |       |

For each item checked "yes," please list on a separate sheet of paper the third-party organization with whom you have relevant affiliations or interests. Please provide sufficient information to enable the American Diabetes Association to make an informed decision. Include 1) the nature of the activity that is a relevant duality, 2) the type of financial arrangement, if any, between you and the third party, and 3) a description of the business or purpose of the third party. Please see the following sample disclosures.

## SAMPLE DISCLOSURES FOR AUTHORS

### Employment

I am employed by Exacta Pharmaceutical Company (6250 Longwood Avenue, Any City, Missouri). My employer manufactures and markets pharmaceuticals related to the treatment of diabetes and its complications.

### Board Membership

I am on the board of directors of the Exacta Pharmaceutical Company, a manufacturer of pharmaceuticals related to the treatment of diabetes.

### Stock Shareholder

I, or my immediate family, hold stock in the following companies that make products related to the treatment or management of diabetes and its complications:

XYZ Corporation  
LMN Corporation

### Honoraria or Consulting Fees

I have received honoraria for speaking engagements from the following:

XYZ Corporation  
LMN Corporation

I am a paid consultant of the XYZ Corporation.

### Grants

The XYZ Corporation is providing funds to my laboratory in order to conduct studies on a new drug to treat diabetic neuropathy.

By answering "yes" in any category, the Association will disclose the relevant duality of interest. The Association will make the disclosure by placing an asterisk by the author's name, and in a footnote describe the nature of the duality of interest, e.g., stock ownership or grant support, and the third party involved.

**This form must be returned with your submission. Make additional copies as needed for all authors. Failure to complete the disclosure may delay or prevent publication of your article.**

## COPYRIGHT TRANSFER AND STATEMENT OF ORIGINALITY

We approve the submission of this paper to the American Diabetes Association for publication and have taken due care to ensure the integrity of this work. We confirm that neither the manuscript nor any part of it has been published or is under consideration for publication elsewhere (abstracts excluded). Any reference to or use of previously published material protected by copyright is explicitly acknowledged in the manuscript.

If this work was produced by an employee of the United States Government as part of his/her official duties, no copyright exists and therefore cannot be transferred. Any co-authors **not** employed by the federal government must sign the copyright transfer agreement.

If this work was produced for an employer as a "work made for hire," an authorized representative of that employer must sign on the appropriate line below.

The undersigned hereby assign copyright for the manuscript entitled

\_\_\_\_\_  
\_\_\_\_\_

to the American Diabetes Association upon its acceptance for publication (attach an additional page for signatures if necessary; **all** authors must sign):

\_\_\_\_\_  
(Author)

\_\_\_\_\_  
(Author)

\_\_\_\_\_  
(Author)

\_\_\_\_\_  
(Author)

\_\_\_\_\_  
(Author)

\_\_\_\_\_  
(Author)

The above title constitutes a "work for hire;" as an authorized agent of the employer, I transfer copyright to the American Diabetes Association (no patent rights are transferred):

\_\_\_\_\_  
Agent

\_\_\_\_\_  
Title

This work was produced on behalf of the United States Government and therefore no copyright exists.

\_\_\_\_\_  
(Author)

\_\_\_\_\_  
(Author)

\_\_\_\_\_  
(Author)

\_\_\_\_\_  
(Author)





Precose<sup>®</sup> for NIDDM\* Therapy

Manage

NIDDM

From

the First

Bite

50 mg, 100 mg  
**Precose<sup>®</sup>**  
(acarbose tablets)  
*NIDDM management from the first bite.*

\* Non-insulin-dependent diabetes mellitus (type II).



Lowers Blood Glucose as an Adjunct to Diet – Alone or  
With a Sulfonylurea\* When Glycemic Control Cannot Be Achieved

**Precose<sup>®</sup>**

## **The First Alpha-Glucosidase Inhibitor**

### **Features a Unique, Nonsystemic Mode of Action<sup>1</sup>**

- Works locally in the small intestine to slow carbohydrate digestion and delay glucose absorption
- Treats NIDDM without drug-induced hypoglycemia, hyperinsulinemia, lactic acidosis, or weight gain<sup>2</sup>

### **Manages Postprandial Glucose Peaks to Improve Glycemic Control, Reducing HbA1c Levels to Help Prevent Diabetes Complications, eg, Retinopathy, Neuropathy, and Nephropathy<sup>1,3,4</sup>**

- Majority of side effects in clinical trials were GI in nature (abdominal pain, diarrhea, and flatulence), related to the mode of action, and generally diminished after 4 to 8 weeks due to adaptation of small intestine enzyme activity<sup>5</sup>
- Precose is not recommended in patients with significant renal dysfunction (serum creatinine > 2.0 mg/dL). Precose is contraindicated in patients with diabetic ketoacidosis, cirrhosis, inflammatory bowel disease, colonic ulceration, or partial intestinal obstruction
- Because efficacy is similar across dosages  $\geq 100$  mg *tid*, and dosages > 100 mg *tid* may be associated with an increased risk of elevated serum transaminase levels, dosages > 100 mg *tid* are not recommended
- Diet and exercise always should be emphasized as primary methods for NIDDM management

\*Precose itself does not cause hypoglycemia. When used in combination with sulfonylureas, it may increase their hypoglycemic potential. Oral glucose, whose absorption is not inhibited by Precose, should be used instead of sucrose in the treatment of mild to moderate hypoglycemia.

Please see brief summary of Prescribing Information on the last page of this advertisement.



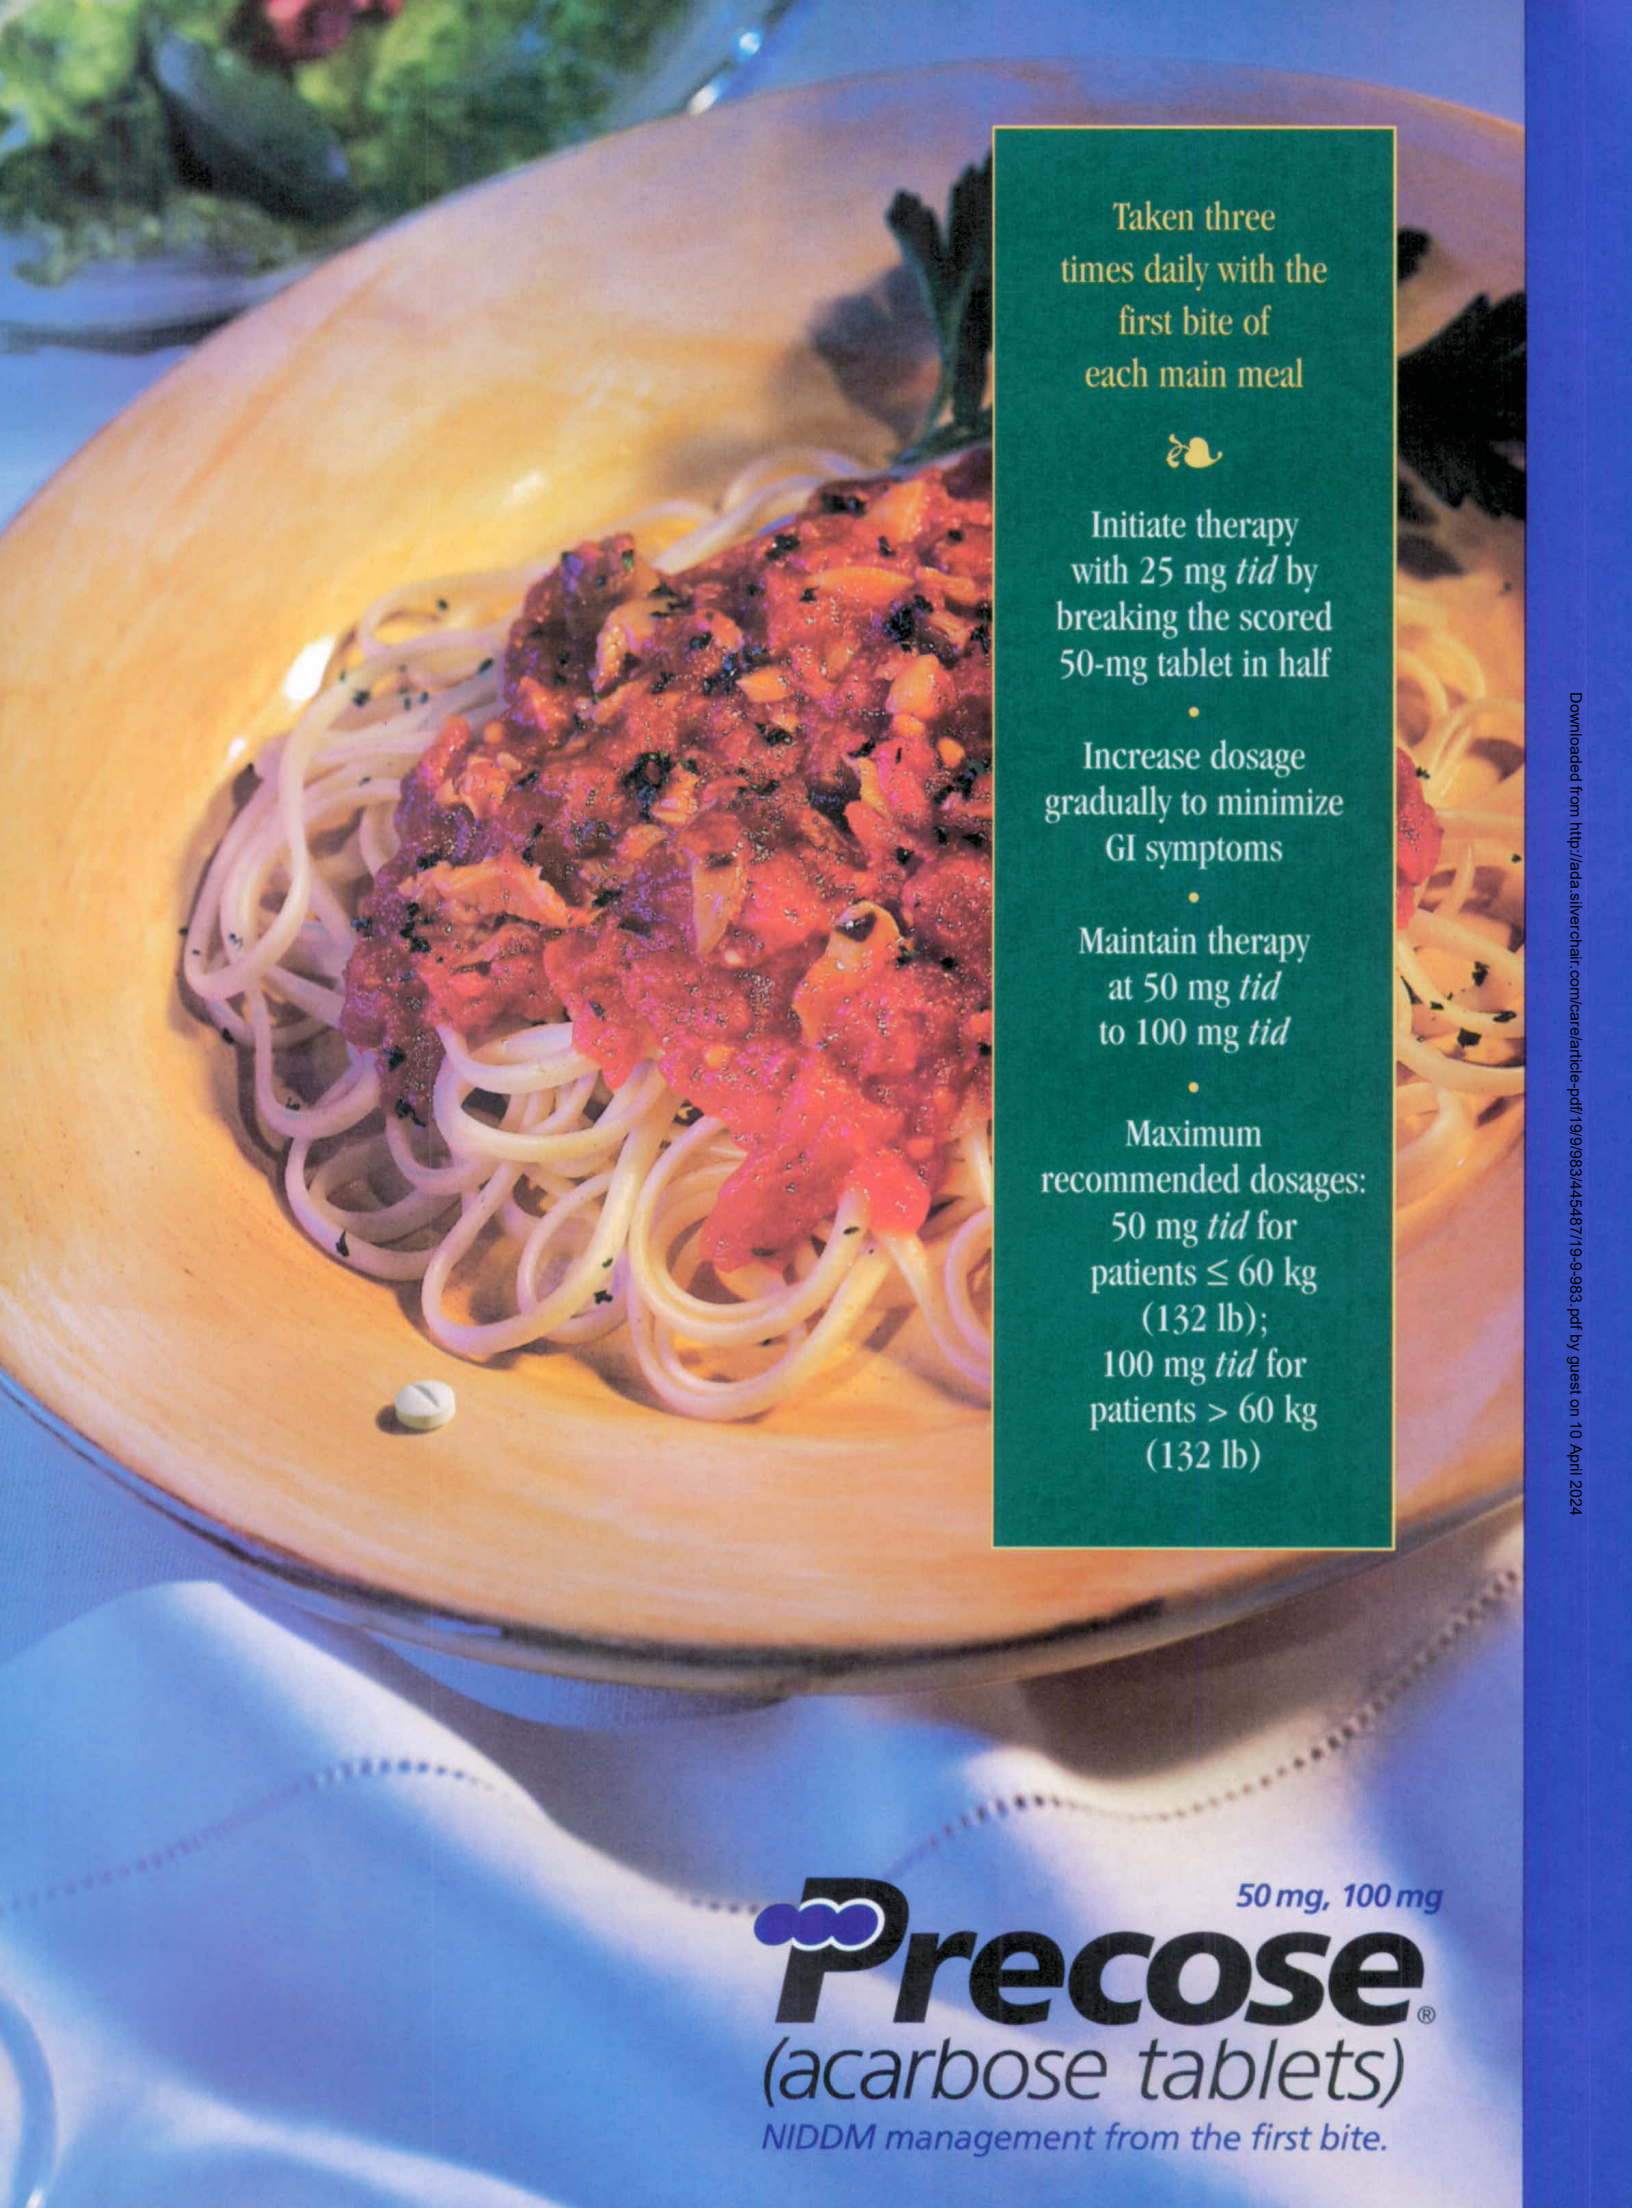A close-up photograph of a light-colored ceramic plate filled with spaghetti topped with a thick, chunky tomato sauce. A single white, oval-shaped tablet with a score line is placed on the plate next to the spaghetti. The background is slightly blurred, showing a blue cloth and some greenery.

Taken three  
times daily with the  
first bite of  
each main meal

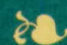

Initiate therapy  
with 25 mg *tid* by  
breaking the scored  
50-mg tablet in half

•  
Increase dosage  
gradually to minimize  
GI symptoms

•  
Maintain therapy  
at 50 mg *tid*  
to 100 mg *tid*

•  
Maximum  
recommended dosages:  
50 mg *tid* for  
patients  $\leq$  60 kg  
(132 lb);  
100 mg *tid* for  
patients  $>$  60 kg  
(132 lb)

50 mg, 100 mg  
**Precose**<sup>®</sup>  
(acarbose tablets)  
NIDDM management from the first bite.



**BRIEF SUMMARY**  
**CONSULT PACKAGE INSERT FOR FULL PRESCRIBING INFORMATION**

PZ500036BS

4/96

**INDICATIONS AND USAGE**

PRECOSE®, as monotherapy, is indicated as an adjunct to diet to lower blood glucose in patients with non-insulin-dependent diabetes mellitus (NIDDM) whose hyperglycemia cannot be managed on diet alone. PRECOSE® may also be used in combination with a sulfonylurea when diet plus either PRECOSE® or a sulfonylurea do not result in adequate glycemic control. The effect of PRECOSE® to enhance glycemic control is additive to that of sulfonylureas when used in combination, presumably because its mechanism of action is different.

In initiating treatment for NIDDM, diet should be emphasized as the primary form of treatment. Caloric restriction and weight loss are essential in the obese diabetic patient. Proper dietary management alone may be effective in controlling blood glucose and symptoms of hyperglycemia. The importance of regular physical activity when appropriate should also be stressed. If this treatment program fails to result in adequate glycemic control, the use of PRECOSE® should be considered. The use of PRECOSE® must be viewed by both the physician and patient as a treatment in addition to diet, and not as a substitute for diet or as a convenient mechanism for avoiding dietary restraint.

**CONTRAINDICATIONS**

PRECOSE® is contraindicated in patients with known hypersensitivity to the drug and in patients with diabetic ketoacidosis or cirrhosis. PRECOSE® is also contraindicated in patients with inflammatory bowel disease, colonic ulceration, partial intestinal obstruction or in patients predisposed to intestinal obstruction. In addition, PRECOSE® is contraindicated in patients who have chronic intestinal diseases associated with marked disorders of digestion or absorption and in patients who have conditions that may deteriorate as a result of increased gas formation in the intestine.

**PRECAUTIONS**

**General**

**Hypoglycemia:** Because of its mechanism of action, PRECOSE® when administered alone should not cause hypoglycemia in the fasted or postprandial state. Sulfonylurea agents may cause hypoglycemia. Because PRECOSE® given in combination with a sulfonylurea will cause a further lowering of blood glucose, it may increase the hypoglycemic potential of the sulfonylurea. Oral glucose (dextrose), whose absorption is not inhibited by PRECOSE®, should be used instead of sucrose (cane sugar) in the treatment of mild to moderate hypoglycemia. Sucrose, whose hydrolysis to glucose and fructose is inhibited by PRECOSE®, is unsuitable for the rapid correction of hypoglycemia. Severe hypoglycemia may require the use of either intravenous glucose infusion or glucagon injection.

**Elevated Serum Transaminase Levels:** In clinical trials, at doses of 50 mg t.i.d. and 100 mg t.i.d., the incidence of serum transaminase elevations with PRECOSE® was the same as with placebo. In long-term studies (up to 12 months, and including PRECOSE® doses up to 300 mg t.i.d.) conducted in the United States, treatment-emergent elevations of serum transaminases (AST and/or ALT) occurred in 15% of PRECOSE®-treated patients as compared to 7% of placebo-treated patients. These serum transaminase elevations appear to be dose related. At doses greater than 100 mg t.i.d., the incidence of serum transaminase elevations greater than three times the upper limit of normal was two to three times higher in the PRECOSE® group than in the placebo group. These elevations were asymptomatic, reversible, more common in females, and, in general, were not associated with other evidence of liver dysfunction.

In international post-marketing experience with PRECOSE® in over 500,000 patients, 19 cases of serum transaminase elevations > 500 IU/L (12 of which were associated with jaundice) have been reported. Fifteen of these 19 cases received treatment with 100 mg t.i.d. or greater and 13 of 16 patients for whom weight was reported weighed < 60 kg. In the 18 cases where follow-up was recorded, hepatic abnormalities improved or resolved upon discontinuation of PRECOSE®.

**Loss of Control of Blood Glucose:** When diabetic patients are exposed to stress such as fever, trauma, infection, or surgery, a temporary loss of control of blood glucose may occur. At such times, temporary insulin therapy may be necessary.

**Information for Patients:** Patients should be told to take PRECOSE® orally three times a day at the start (with the first bite) of each main meal. It is important that patients continue to adhere to dietary instructions, a regular exercise program, and regular testing of urine and/or blood glucose.

PRECOSE® itself does not cause hypoglycemia even when administered to patients in the fasted state. Sulfonylurea drugs and insulin, however, can lower blood sugar levels enough to cause symptoms or sometimes life-threatening hypoglycemia. Because PRECOSE® given in combination with a sulfonylurea or insulin will cause a further lowering of blood sugar, it may increase the hypoglycemic potential of these agents. The risk of hypoglycemia, its symptoms and treatment, and conditions that predispose to its development should be well understood by patients and responsible family members. Because PRECOSE® prevents the breakdown of table sugar, patients should have a readily available source of glucose (dextrose, D-glucose) to treat symptoms of low blood sugar when taking PRECOSE® in combination with a sulfonylurea or insulin.

If side effects occur with PRECOSE®, they usually develop during the first few weeks of therapy. They are most commonly mild-to-moderate gastrointestinal effects, such as flatulence, diarrhea, or abdominal discomfort and generally diminish in frequency and intensity with time.

**Laboratory Tests:** Therapeutic response to PRECOSE® should be monitored by periodic blood glucose tests. Measurement of glycosylated hemoglobin levels is recommended for the monitoring of long-term glycemic control.

PRECOSE®, particularly at doses in excess of 50 mg t.i.d., may give rise to elevations of serum transaminases and, in rare instances, hyperbilirubinemia. It is recommended that serum transaminase levels be checked every 3 months during the first year of treatment with PRECOSE® and periodically thereafter. If elevated transaminases are observed, a reduction in dosage or withdrawal of therapy may be indicated, particularly if the elevations persist.

**Renal Impairment:** Plasma concentrations of PRECOSE® in renally impaired volunteers were proportionally increased relative to the degree of renal dysfunction. Long-term clinical trials in diabetic patients with significant renal dysfunction (serum creatinine > 2.0 mg/dL) have not been conducted. Therefore, treatment of these patients with PRECOSE® is not recommended.

**Drug Interactions:** Certain drugs tend to produce hyperglycemia and may lead to loss of blood glucose control. These drugs include the thiazides and other diuretics, corticosteroids, phenothiazines, thyroid products, estrogens, oral contraceptives, phenytoin, nicotinic acid, sympathomimetics, calcium channel-blocking drugs, and isoniazid. When such drugs are administered to a patient receiving PRECOSE®, the patient should be closely observed for loss of

blood glucose control. When such drugs are withdrawn from patients receiving PRECOSE® in combination with sulfonylureas or insulin, patients should be observed closely for any evidence of hypoglycemia.

Intestinal adsorbents (e.g., charcoal) and digestive enzyme preparations containing carbohydrate-splitting enzymes (e.g., amylase, pancreatin) may reduce the effect of PRECOSE® and should not be taken concomitantly.

**Carcinogenesis, Mutagenesis, and Impairment of Fertility:** Nine chronic toxicity/carcinogenicity studies were conducted in three animal species (rat, hamster, dog) including two rat strains (Sprague-Dawley and Wistar).

In the first rat study, Sprague-Dawley rats received acarbose in feed at high doses (up to approximately 500 mg/kg body weight) for 104 weeks. Acarbose treatment resulted in a significant increase in the incidence of renal tumors (adenomas and adenocarcinomas) and benign Leydig cell tumors. This study was repeated with a similar outcome. Further studies were performed to separate direct carcinogenic effects of acarbose from indirect effects resulting from the carbohydrate malnutrition induced by the large doses of acarbose employed in the studies. In one study using Sprague-Dawley rats, acarbose was mixed with feed but carbohydrate deprivation was prevented by the addition of glucose to the diet. In a 26-month study of Sprague-Dawley rats, acarbose was administered by daily postprandial gavage so as to avoid the pharmacologic effects of the drug. In both of these studies, the increased incidence of renal tumors found in the original studies did not occur. Acarbose was also given in food and by postprandial gavage in two separate studies in Wistar rats. No increased incidence of renal tumors was found in either of these Wistar rat studies. In two feeding studies of hamsters, with and without glucose supplementation, there was also no evidence of carcinogenicity.

Acarbose showed no mutagenic activity when tested in six *in vitro* and three *in vivo* assays.

Fertility studies conducted in rats after oral administration produced no untoward effect on fertility or on the overall capability to reproduce.

**Pregnancy:**

**Teratogenic Effects:** Pregnancy Category B. The safety of PRECOSE® in pregnant women has not been established. Reproduction studies have been performed in rats at doses up to 480 mg/kg (corresponding to 9 times the exposure in humans, based on drug blood levels) and have revealed no evidence of impaired fertility or harm to the fetus due to acarbose. In rabbits, reduced maternal body weight gain, probably the result of the pharmacodynamic activity of high doses of acarbose in the intestines, may have been responsible for a slight increase in the number of embryonic losses. However, rabbits given 160 mg/kg acarbose (corresponding to 10 times the dose in man, based on body surface area) showed no evidence of embryotoxicity and there was no evidence of teratogenicity at a dose 32 times the dose in man (based on body surface area). There are, however, no adequate and well-controlled studies of PRECOSE® in pregnant women. Because animal reproduction studies are not always predictive of the human response, this drug should be used during pregnancy only if clearly needed. Because current information strongly suggests that abnormal blood glucose levels during pregnancy are associated with a higher incidence of congenital anomalies as well as increased neonatal morbidity and mortality, most experts recommend that insulin be used during pregnancy to maintain blood glucose levels as close to normal as possible.

**Nursing Mothers:** A small amount of radioactivity has been found in the milk of lactating rats after administration of radiolabeled acarbose. It is not known whether this drug is excreted in human milk. Because many drugs are excreted in human milk, PRECOSE® should not be administered to a nursing woman.

**Pediatric Use:** Safety and effectiveness of PRECOSE® in pediatric patients have not been established.

**ADVERSE REACTIONS**

**Digestive Tract:** Gastrointestinal symptoms are the most common reactions to PRECOSE®. In U.S. placebo-controlled trials, the incidences of abdominal pain, diarrhea, and flatulence were 21%, 33%, and 77% respectively in 1075 patients treated with PRECOSE® 50-300 mg t.i.d., whereas the corresponding incidences were 9%, 12%, and 32% in 818 placebo-treated patients. Abdominal pain and diarrhea tended to return to pretreatment levels over time, and the frequency and intensity of flatulence tended to abate with time. The increased gastrointestinal tract symptoms in patients treated with PRECOSE® is a manifestation of the mechanism of action of PRECOSE® and is related to the presence of undigested carbohydrate in the lower GI tract. Rarely, these gastrointestinal events may be severe and might be confused with paralytic ileus.

**Elevated Serum Transaminase Levels:** See PRECAUTIONS.

**Other Abnormal Laboratory Findings:** Small reductions in hematocrit occurred more often in PRECOSE®-treated patients than in placebo-treated patients but were not associated with reductions in hemoglobin. Low serum calcium and low plasma vitamin B<sub>6</sub> levels were associated with PRECOSE® therapy but were thought to be either spurious or of no clinical significance.

**Caution:** Federal law prohibits dispensing without a prescription.

PZ500036BS 4/96  
© 1996 Bayer Corporation

Bay g 5421  
6160

PRECOSE®/5202/0/8/USA-1  
Printed in U.S.A.

**References**

1. Precose® (acarbose tablets) Package Insert.
2. Coniff RE, Shapiro JA, Robbins D, et al. Reduction of glycosylated hemoglobin and postprandial hyperglycemia by acarbose in patients with NIDDM. *Diabetes Care*. 1995;18(6):817-824.
3. Coniff RE, Shapiro JA, Seaton TB, Bray GA. Multicenter, placebo-controlled trial comparing acarbose (BAY g 5421) with placebo, tolbutamide, and tolbutamide-plus-acarbose in non-insulin-dependent diabetes mellitus. *Am J Med*. 1995;98:443-451.
4. American Diabetes Association. Implications of the Diabetes Control and Complications Trial. *Diabetes Care*. 1993;16(11):1517-1520.
5. Hanefeld M. Acarbose efficacy review. *Practical Diabetes Suppl*. 1993;10(6):S21-S27.

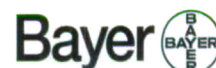

**Pharmaceutical  
Division**

© May 1996 Bayer Corporation  
All Rights Reserved. Printed in USA. A09536



# Carbohydrate Counting is Here!

## What is Carbohydrate Counting and Why Teach It?

Carbohydrate Counting is a new diabetes meal planning approach found to be effective during the Diabetes Control and Complications Trial (DCCT). Studies have proven that carbohydrate(CHO) intake is the main factor affecting blood glucose, and that although they vary in nutritive value, all carbohydrates have nearly equal impact on blood sugar. Therefore, emphasis is placed on the total amount of CHO consumed, rather than the type.

Carbohydrate Counting gives patients more food choices and greater meal planning flexibility. And because it offers a more precise matching of food, activity, and medication, it can lead to improved blood glucose control.

**Order Toll-Free**  
**1-800-ADA-ORDER**  
(232-6733)

**or fax your order to:**  
**770/442-9742**

## Three Levels Let You Individualize Teaching

Copublished by the American Diabetes Association and The American Dietetic Association, these Carbohydrate Counting booklets are available at three levels of complexity (see below) to help you meet the varied needs of your patients. Each package includes 10 booklets and accompanying professional information.

### Getting Started (Level 1):

Introduces the concepts of carbohydrate counting. Patients will learn which foods contain carbohydrates and how to consume consistent amounts on a daily basis. Intended for all diabetes patients (IDDM, NIDDM, or GDM). #CCCL1

Nonmember: \$18.00; Member: \$15.00

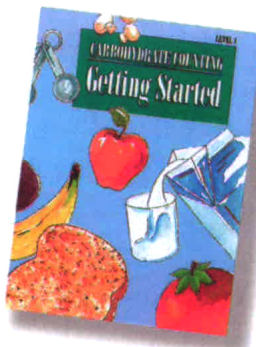

### Moving On (Level 2):

Patients learn to identify and interpret patterns in their blood glucose levels based on their food intake, medication, and physical activity (known as pattern management). Intended for any patient who has mastered the basics of carbohydrate counting. #CCCL2

Nonmember: \$18.00; Member: \$15.00

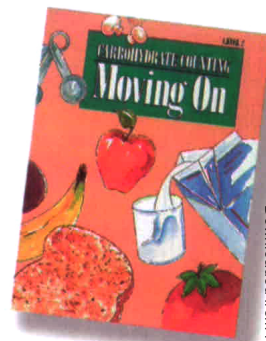

### Using Carbohydrate/Insulin Ratios (Level 3):

Building on the skills taught in levels 1 and 2, it teaches patients to adjust insulin for changes in food or physical activity using a ratio of carbohydrate intake to insulin dosage. Intended for patients on intensive insulin management

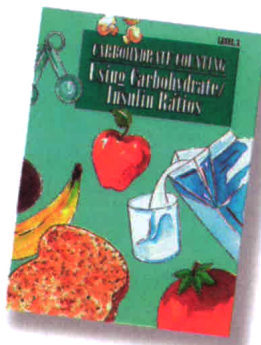

## Sample Pack

Includes one copy of each booklet and the professional guide. #CCCSP  
Nonmember: \$6.00  
Member: \$5.00

(multiple daily injections or insulin pump) who have mastered insulin adjustment and supplementation. #CCCL3  
Nonmember: \$18.00; Member: \$15.00

- ☐ YES! Please send me the books I've listed, and include a free catalog.  
☐ NO. I'm not ordering right now, but please send me a free catalog.

| Item # | Item Name | Qty | Unit Price | Total |
|--------|-----------|-----|------------|-------|
|        |           |     |            |       |
|        |           |     |            |       |

| Shipping & Handling |            |
|---------------------|------------|
| up to \$30.00       | add \$3.00 |
| \$30.01-\$50.00     | add \$4.00 |
| over \$50.00        | add 8%     |

|                                 |          |
|---------------------------------|----------|
| Publications Subtotal           | ..... \$ |
| VA Residents add 4.5% tax       | ..... \$ |
| GA Residents add 6% tax         | ..... \$ |
| Shipping & Handling (see chart) | \$       |
| Total Due                       | ..... \$ |

Allow 2-3 weeks for shipment. Add \$3 for each additional shipping address. Add \$15 for each address outside the U.S. Foreign orders must be paid in US funds, drawn on a US bank.

### Ship To

|                |                |           |
|----------------|----------------|-----------|
| First Name     | Middle Initial | Last Name |
| Address        |                |           |
| City/State/Zip |                |           |
| Phone          | Member #       | P29C797   |

☐ Payment enclosed (check or money order)

Charge my: ☐ VISA ☐ MC ☐ AMEX

Account Number: \_\_\_\_\_

Signature: \_\_\_\_\_ Exp. Date: \_\_\_\_/\_\_\_\_/\_\_\_\_

Mail to: American Diabetes Association  
Order Fulfillment Department  
P.O. Box 930850  
Atlanta, GA 31193-0850

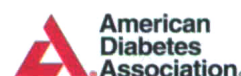

Source: https://ada.silverchair.com/care/article-pdf/19/9/983/445487/19-9-983.pdf
